# Supplementary material
Source: publisher figshare collection journal article supplement (https://gsajournals.figshare.com/ndownloader/files/11038760)
Supplement: Supplementary file 1 [file 11038760]

## Sheet: Sheet1
Strain	Genotype	Source	Strain construction
N2	Wild type	CGC
AMS33*	isp-1(qm150) IV; zcIs13[hsp-6::GFP] IV	Matt Kaeberlein (UW)
AMS34*	atfs-1 (et15) V; zcIs9 [hsp-60::GFP + lin-15(+)] V	Cole Haynes (Umass)
BC11635	dpy-5(e907) I; sEx11635 [rCes hmgs-1pr::GFP+ pCeh361]	David. L. Baillie (SFU)
CF2258	zcIs4[Phsp-4::gfp]V;irg-7(zc6)X	Sivan Henis-Korenblit (Bar Ilan U)
CL2166	dvIs19 [(pAF15)gst-4p::GFP::NLS] III	CGC
CL691	dvIs19 III; skn-1(zu67) IV/nT1 [unc-?(n754) let-?] (IV;V).	CGC
CMH3	atfs-1(tm4525), zcIS9 (hsp-60pr::gfp) V	Cole Haynes (Umass)
CMH4	atfs-1(tm4919) V	Cole Haynes (Umass)
LD1171	ldIs3 [gcs-1p::GFP + rol-6(su1006)]	CGC
MQ130	clk-1(qm30) III	CGC
MQ887	isp-1(qm150) IV	CGC
NIS1011	kytEx1011 [rheb-1p::rheb-1::GFP + rol-6(su1006)]	CGC
OP398	wgIs398 [dve-1::TY1::EGFP::3xFLAG + unc-119(+)]	CGC
PS2172	pha-1(e2123ts) III;him-5(e1490) V	Paul. W. Sternberg (Caltech)
PS6547	syIs254[syEx1255 fosmid-HMGS-1::2YT::eGFP::3xL:FLAG+ myo-2::mRFP+ Pha-1(+)+ unc-119(+)]	Paul. W. Sternberg (Caltech)
QC115	atfs-1(et15) V	CGC
QC118	atfs-1(et18) V	CGC
SJ4005	zcIs4 [hsp-4::GFP] V	CGC
SJ4054	zcIs4[Phsp-4::gfp]V; pek-1(zcDf2)X	Sivan Henis-Korenblit (Bar Ilan U)
SJ4058	zcIs9 [hsp-60::GFP + lin-15(+)]	CGC
SJ4100	zcIs13[hsp-6::GFP]	CGC
SJ4143	zcIs17 [ges-1::GFP(mit)]	CGC
SJ4144	zcIs18 [ges-1::GFP(cyt)]	CGC
SJ4197	zcIs39 [dve-1p::dve-1::GFP].	CGC
SLR0064	nuo-6(qm200) I; dvIs19 [(pAF15)gst-4p::GFP::NLS] III	Shane L. Rea (UT)
SLR0117	isp-1(qm150) IV; dvIs67[pCL179(Ptbb-6::GFP)]	Shane L. Rea (UT)
SLR115	dvIs67[pCL179(Ptbb-6::GFP)]	Shane L. Rea (UT)
SPC167	skn-1(lax120) IV, dvIs19 [(pAF15)gst-4p::GFP::NLS] III	CGC
VC1772	skn-1(ok2315) IV/nT1 [qIs51] (IV;V)	CGC
VC436	coq-3(ok506) IV/nT1 [qIs51] (IV;V)	CGC
VC479	coq-1(ok749) I	CGC
VC752	coq-2(ok1066) III	CGC
VC3504	Wild type strain for CRISPR-cas9 experiments	Donald G. Moerman (UBC)
VC3874	/nT1 IV; hmgs-1(gk3838 gkIs249)/nT1 V	Donald G. Moerman (UBC)
Strains constructed in this study
AMS11	pha-1(e2123ts) III;him-5(e1490) V; winEx1 [hmgr-1p::hmgr-1::gfp, pha-1 (+), ttx-3::mRFP)	This study	Injection of winEx1 into PS2172
AMS29	dpy-5(e907)I; winIS2 [rCes hmgs-1pr::GFP+ pCeh361]	This study	Integration of BC11635
AMS36	coq-2(ok1066) III/hT2 [bli-4(e937) let-?(q782) qIs48] (I;III); syIs254 V	This study	PS6547 X VC572
AMS38	coq-2(ok1066) III/hT2 [bli-4(e937) let-?(q782) qIs48] (I;III); zcIs13[hsp-6::GFP]V	This study	SJ4100 X VC572
AMS45	isp-1(qm150)IV ; syIs254 V	This study	PS6547 X MQ887
AMS46	coq-1(ok749)szT1[lon-2(e678)] I; hT2[bli-4(e937) let-?(q782) qIs48] (I:III); zcIs13[hsp-6::GFP] V	This study	VC479 X SJ4100
AMS47	coq-1(ok749)szT1[lon-2(e678)] I; hT2[bli-4(e937) let-?(q782) qIs48] (I:III)	This study	VC479 X VC1772
AMS55	pha-1(e2123ts) III; winEx10 [coq-1pr::coq-1::gfp, pha-1 (+), ttx-3::mRFP]	This study	Injection of winEx10 into PS2172
AMS60	/nT1 IV; hmgs-1(gk3838 gkIs249)/ nT1 V	This study	Outcrossed four times to N2
AMS61	/nT1 IV; hmgs-1(gk3838 gkIs249)/nT1, syIs254[syEx1255 fosmid-HMGS-1::2YT::eGFP::3xL:FLAG+ myo-2::mRFP+ Pha-1(+)+ unc-119(+)] V	This study	AMS60 X PS6547
* These strains were obtained without a strain number, therefore assigned with an AMS strain number
**For crosses, the hermaphrodite strain is written first, followed by the male
